# Supplementary material for: Parallel Losses of Blue Opsin Correlate with Compensatory Neofunctionalization of UV-Opsin Gene Duplicates in Aphids and Planthoppers
Source: Preprints.org preprint supplement (doi:10.20944/preprints202306.1733.v1), 2023-06-26
Supplement: Supplementary file 1 [file Supp 1 Opsin homolog accession numbers.xlsx]

## Sheet: Hemiptera 23 B
Species	Suborder	Superfamily	Family	LW Opsins	B Opsins	UV Opsins	NCBI genome assembly#	Genome coverage	BUSCO filter	BUSCO completeness	References
Nilaparvata lugens	Auchenorrhyncha	Fulgoroidea	Delphacidae	XP_039295943	-	XP_039285232 XP_039285228	ASM1435652v1	418.0x	hemiptera_odb10	0.97	Matsumoto et al.(2014) Ma et al. (2021)
Laodelphax striatellus	Auchenorrhyncha	Fulgoroidea	Delphacidae	RZF36139	-	BAO03863 BAO03862	ASM333518v2	370.0x	arthropoda_odb10	0.98	Ma et al. (2021) Zhu et al. (2017) Matsumoto et al.(2014)
Sogatella furcifera	Auchenorrhyncha	Fulgoroidea	Delphacidae	BAO03858	-	BAO03860 BAO03859	ASM1714138v1	125.0x	na	na	Matsumoto et al.(2014) Ma et al. (2021)
Clastoptera arizonana	Auchenorrhyncha	Cercopoidea	Clastopteridae	GEDC01016786	GEDC01026123	GEDC01015247	na	na	na	na	BioProject: PRJNA303152
Tamasa doddi	Auchenorrhyncha	Cicadoidea	Cicadidae	GEIK01032296	GEIK01032035	GEIK01048237	na	na	na	na	Johnson et al. (2018)
Burbunga queenslandica	Auchenorrhyncha	Cicadoidea	Cicadidae	GEJZ01024619	GEJZ01025003	GEJZ01025175	na	na	na	na	Johnson et al. (2018)
Nephotettix cincticeps	Auchenorrhyncha	Membracoidea	Cicadellidae	BAO03864	BAO03865	BAO03866	ASM2337572v1	123.0x	insecta_odb10	0.97	Matsumoto et al.(2014)
Empoasca vitis	Auchenorrhyncha	Membracoidea	Cicadellidae	AHK12248	AIY53970	AHN82368	na	na	na	na	unpublished
Matsumurasca onukii	Auchenorrhyncha	Membracoidea	Cicadellidae	QCC70516	QCC70517	QCC70518	GCA_018831715.1	100.0x	na	na	Yan et al. (2021)
Xenophysella greensladeae	Coleorrhyncha	-	Peloridiidae	GAYI02055701	GAYI02059430	GAYI02063107	na	na	na	na	Misof et al. (2014)
Gerris buenoi	Heteroptera	Gerroidea	Gerridae	LW1 GBUE012030 LW2 GBUE012031 LW3 GBUE012032 LW4 GBUE012033	-	GBUE021384	Gbue_2.0	73.8x	na	0.854	Armisen et al. (2018)
Halyomorpha halys	Heteroptera	Pentatomoidea	Pentatomidae	XP_014274078 XP_014274077 XP_014274075	-	XP_014273911	Hhal_2.0	113.7x	hemiptera_odb10	99.2	Sparks et al. (2020)
Acyrthosiphon pisum	Sternorrhyncha	Aphidoidea	Aphididae	XP_008185403	-	XP_001951588 XP_001951613	pea_aphid_22Mar2018_4r6ur_v2	789.4x	insecta_odb10	0.935	Li et al. (2019)
Myzus persicae	Sternorrhyncha	Aphidoidea	Aphididae	XP_022159972	-	XP_022162222 XP_022162214	MPER_G0061.0	200.0x	hemiptera_odb10	0.998	Rispe et al. (2008)
Sipha flava	Sternorrhyncha	Aphidoidea	Aphididae	XP_025414175	-	XP_025410308 XP_025410414	YSA_version1	60.0x	hemiptera_odb11	0.967	BioProject PRJNA479456
Cinara cedri	Sternorrhyncha	Aphidoidea	Aphididae	LW_VVC43438	-	VVC32069 VVC32067	CINCED3	80.0x	insecta_odb10	0.939	Julca et al. (2020)
Rhopalosiphum maidis	Sternorrhyncha	Aphidoidea	Aphididae	XP_026807241	-	XP_026808077 XP_026807991	ASM367621v3	208.0x	hemiptera_odb11	0.998	BioProject PRJNA503266
Bemisia tabaci	Sternorrhyncha	Aleyrodoidea	Aleyrodidae	XP_018901683	XP_018913779	XP_018909731	ASM185493v1	300.0x	hemiptera_odb12	0.97	Chen et al. (2016)
Pachypsylla celtidismamma	Sternorrhyncha	Psylloidea	Aphalaridae	GCYC01060233	GCYC01076696	GCYC01081548	na	na	na	na	Johnson et al. (2018)
Diaphorina citri	Sternorrhyncha	Psylloidea	Liviidae	GDFN01027368	XP_008487287	KAI5717139	na	na	na	na	Johnson et al. (2018)
