# Supplementary material for: Parallel Losses of Blue Opsin Correlate with Compensatory Neofunctionalization of UV-Opsin Gene Duplicates in Aphids and Planthoppers
Source: Preprints.org preprint supplement (doi:10.20944/preprints202306.1733.v1), 2023-06-26
Supplement: Supplementary file 2 [file Supplementary data file 2.xlsx]

## Sheet: JTT of Aphids
	STERNORRHYNCHA
	Dcit_UV	Apis UV-anc	Rmai UV-anc	Mper UV-anc	Sfla UV-anc	Cced UV-anc
Apis UV-anc	0.6841
Rmai UV-anc	0.6731
Mper UV-anc	0.6731
Sfla UV-anc	0.6804
Cced UV-anc	0.6222
Apis UV-der	0.7564	0.3365
Rmai UV-der	0.7375		0.3279
Mper UV-der	0.7582			0.3371
Sfla UV-der	0.7462				0.3575
Cced UV-der	0.7727					0.3329
	to outgroup (Dcit UV):			UV-der vs UV-anc:
	0.66658	0.0252614		0.33975	0.0125575
	0.7542	0.0132851
	AUCHENORRHYNCHA
	Monu_UV	Nlug_UV-anc	Lstri_UV-anc	Sfur_UV-anc
Nlug_UV-anc	0.49809
Lstri_UV-anc	0.50747
Sfur_UV-anc	0.50074
Nlug_UV-der	0.55375	0.20625
Lstri_UV-der	0.55932		0.19152
Sfur_UV-der	0.54663			0.17985
	to outgroup (Monu UV):			UV-der vs UV-anc:
	0.502	0.005		0.193	0.013
	0.553	0.006
