# Supplementary material for: Parallel Losses of Blue Opsin Correlate with Compensatory Neofunctionalization of UV-Opsin Gene Duplicates in Aphids and Planthoppers
Source: Preprints.org preprint supplement (doi:10.20944/preprints202306.1733.v1), 2023-06-26
Supplement: Supplementary file 3 [file Supplementary data file 3.xlsx]

## Sheet: Supp 2
		Chrysochroa rajah		Sternorrhyncha			Auchenorrhyncha
Bos taurus Rhodopsin	C. rajah UV2 site	UV2 (anc)	UV1 (der)	Ancestral	UV-anc	UV-der	Ancestral	UV-anc	UV-der	Previously referenced	Evidence	Reference
12	20	H	E	Q,K	T(R)	L(A)	V,P	Q	E	yes		Lord et al. (2016)
15	23	I	L	L	L	M	L	L	L	no
26	35	I	I	I	I	I	I	I	V	no
33	42	Y	Y	Y	Y	Y	Y	Y	H	no
43	56	L	L	L	M	S	I/L	L	V	no
47	60	L	Y	F	F	L	F	F	Y	no
52	65	I	T	V/I/L	L	V	L	L	F	no
63	74	S	S	L/I	C	C	C	C	S	no
84	97	F	L	F	F	F	F	F	L	no
85	98	V	I	V/M	V/L/C	S	M/L	M/L	L	no
87	100	M	L	M	M	V	M	M	M	no
90	102	K	K	K	K	V	K	K	K	yes		Salcedo et al. (2003)
94	106	F	F	F	F	L	F	F	F	no
102	114	G	G	G	G	K(T)	G	G	G	no
105	117	A	T	Q	Q	P	L	T/S	A	yes		Lord et al. (2016)
107	119	F	H	H(P)	H	H	Q	H	H	yes		Lord et al. (2016)
113	125	F	F	F	F	F	F	F	F	yes	Modeling predicted chromophore binding pocket localization	Sharkey et al. (2023)
117	129	G	G	G	G	G	G	G	G	yes	Modeling predicted chromophore binding pocket localization	Sharkey et al. (2023)
118	130	T	S	S/A	A/T/S	S	S	S	S	yes	Modeling predicted chromophore binding pocket localization	Sharkey et al. (2023)
121	133	G	G	G	G	G	G	G	G	yes	Modeling predicted chromophore binding pocket localization	Sharkey et al. (2023)
122	134	I	I	I	I/L	I	I	I	I	yes	Modeling predicted chromophore binding pocket localization	Sharkey et al. (2023)
125	137	G	G	G/S	S	G	A	S	S	yes		Lord et al. (2016)
137	139	H	T	R	S	S	S	V	V	yes		Lord et al. (2016)
144	156	E	E	D	E	E	D	D	D	no
152	163	K	K	K	R	K	K	K	K	no
172	183	L	L	F	L/A	L	L	M	I/M	yes		Lord et al. (2016)
183	195	F	F	Y	Y	F	Y	Y	F	no
186	198	Q	A	S	S	S	A	S	S	yes	Modeling predicted chromophore binding pocket localization	Lord et al. (2016) Sharkey et al. (2023)
187	199	C	C	C	C	C	C	C	C	yes	Modeling predicted chromophore binding pocket localization	Sharkey et al. (2023)
188	200	T	S	T,S	T	S	S	S	S	yes		Lord et al. (2016)
189	201	F	F	F	I/F	F	F	F	F	yes	Modeling predicted chromophore binding pocket localization	Sharkey et al. (2023)
191	203	Y	Y	Y	Y	Y	Y	Y	Y	yes	Modeling predicted chromophore binding pocket localization	Sharkey et al. (2023)
195	207	T	T	T	T	T	T	S/N	T	no
201	211	H	H	R	R,K	K	R	Q	R	no
204	214	V	V	V	L/V	V	V	V	T	no
207	217	L	I	M	M	M/L	L	M	M	yes	Modeling predicted chromophore binding pocket localization	Lord et al. (2016) Sharkey et al. (2023)
212	222	Y	Y	Y	Y	Y	Y	Y	Y	yes	Modeling predicted chromophore binding pocket localization	Sharkey et al. (2023)
219	229	I	I	I	V	I	I	I	I	no
242	266	Q	T	(D)K	D	D	Q,S,N	A	A	yes		Lord et al. (2016)
244	268	Q	Q	(D)S	Q	Q	Q	Q	M	no
261	285	F	Y	F	F	F	F	F	F	yes	Modeling predicted chromophore binding pocket localization	Lord et al. (2016) Sharkey et al. (2023)
264	288	S	A	S	S/A	A	S	S	A	no
265	289	W	W	W	W	W	W	W	W	yes	Modeling predicted chromophore binding pocket localization	Sharkey et al. (2023)
268	293	Y	Y	Y	Y	Y	Y	Y	Y	yes	Modeling predicted chromophore binding pocket localization	Sharkey et al. (2023)
269	294	A	A	A	A	A	A	A	A	yes	Modeling predicted chromophore binding pocket localization	Sharkey et al. (2023)
270	295	V	V	(T)V	I/V	I/V/A	V	V	I	no
272	297	A	A	A	A	A	A	A	A	yes		Lord et al. (2016)
273	298	M	M	L	M	M(L)	L	M	L	no
286	310	G	G	G	G	I	G	G	G/V	no
287	311	F	I	V,L	(I)V	A,V	V	L	V	no
292	316	A	S	A	A	A	A	A	A	yes	Modeling predicted chromophore binding pocket localization	Sharkey et al. (2023)
293	317	C	C	C	I	V	L	C	L	yes		Lord et al. (2016)
294	318	A	F	C,T,A	F	F	T	T	A	yes		Lord et al. (2016)
295	319	C	C	C	C	A	C	C	C	no
296	320	K	K	K	K	K	K	K	K	yes	Modeling predicted chromophore binding pocket localization	Sharkey et al. (2023)
na	264	Q	T	(D)K	D	D	Q,S,N	A	A	no
na	45	A	E	E	E	E	A	E	A	no
na	29	A	N	P	A	P	T	T	L	no
na	47	E	E	D	S	R	E	D	E	no
