# Supplementary material for: Parallel Losses of Blue Opsin Correlate with Compensatory Neofunctionalization of UV-Opsin Gene Duplicates in Aphids and Planthoppers
Source: Preprints.org preprint supplement (doi:10.20944/preprints202306.1733.v1), 2023-06-26
Supplement: Supplementary file 4 [file Supplementary data file 4.docx]

11 11111

12 345678901 23456

Btau_rhodopsin 1 MN--------------------------------------GTEGPNFYV----------------------PFSNK------- 16

Craj_UV2-anc 1 MHLTN----------------Y--S-VKFP-------------------------EAR--VM---D---SGHQLIAWNVPAAD 31

Adif_UV2-anc 1 MVWSVSLSAVANPPTMMRLINW--T-DHTIL--A---------------------EPR--IM---E---SR**P**GSMEWNISPEN 49

Craj_UV1-der 1 MKEMM--------------FNG--TFLDGPL--P---------------------QAR--VL---S---EERRLLGWNVDNSD 36

Adif_UV1-der 1 ML-----------------LNW--TAIDRPL--P---------------------QLG--GD--SG---HE**V**RLLGWNIPPSE 34

Focc_UV 1 MEYPESAD-C---------SNG--T-AWLPV--A---------------------EARIGSGVSGP---SEQRLLGWNVPPDE 44

Dcit_UV 1 MESDFY-------------LND--T-SIGPVALARVAAQQSFSVNEKLFVPIFSPRVAAQQSF-SV---NGKRMLGWNVPPED 63

Pcel_UV 1 ----------------------------------------------------------------------------------- 0

Apis_UV-anc 1 MSPTLIMD-----------FNR--T-VSRPL--A---------------------QLG--LME-NE--VGE**T**HL**L**GWNLQ**A**ED 41

Rmai_UV-anc 1 MSPTLIMD-----------FNR--T-VSRPL--P---------------------QLG--LME-NE--VGE**T**HL**L**GWNLP**A**ED 41

Mper_UV-anc 1 MSPTMIMD-----------FNR--T-VSRPL--Q---------------------QLG--LME-NE--VGE**T**HL**L**GWNLP**A**ED 41

Sfla_UV-anc 1 MFPALIMD-----------FNR--T-VSRPL--P---------------------QMG--SAD-DA--GGE**T**HL**L**GWNLG**A**ED 41

Cced_UV-anc 1 MMM---MD-----------FNR--T-VSKPL--P---------------------ELG--LLE-NEPGETG**R**QL**L**GWNLA**A**ED 40

Apis_UV-der 1 MD-----------------FNR--S-VSRPL--S---------------------QLGSSFME-NE---EE**L**QL**M**GWNLT**P**ED 36

Rmai_UV-der 1 MD-----------------FNR--S-VSRPL--S---------------------QLGSSFME-NE---DE**L**QL**M**GWNLT**P**ED 36

Mperi_UV-der 1 MD-----------------FNR--S-VSRPL--S---------------------QLGSSFME-NE---DE**L**QL**M**GWNLT**P**ED 36

Sfla_UV-der 1 MD-----------------FNR--S-ISRTL--S---------------------QLG--FME-EE---PE**L**HL**M**GWNLT**P**ED 34

Cced_UV-der 1 MD-----------------FNG--S-VLRPL--P---------------------QLG--PMD-ND---EE**A**HL**M**GWNLT**P**ED 34

Ncin_UV 1 MEFFNGAS-----------YNTSS-----PVAMA---------------------RMG--LG---A---GAPRMLGWNVPTED 38

Evit_UV 1 MEVFDGAN-----------YNASAA-LFQPQALP---------------------RLG--M----P---NGVQMLGWNVPTEE 41

Monu_UV 1 MEYLSGAD-----------YNASAA-LFQPQALP---------------------RLG--M----P---NGVQMLGWNVPTEE 41

Nlug_UV-anc 1 MEAFGGANNC---------PNG--T-VWGPQ--A---------------------S----F----R---TA**Q**RSLIWNVP**T**DE 37

Lstr_UV-anc 1 MDVFGGAKNC---------PNE--T-VWGPQ--A---------------------S----F----R---TA**Q**RSLIWNVP**T**EE 37

Sfur_UV-anc 1 MDVFGGAKNC---------PNE--T-VWGPQ--A---------------------S----F----R---TA**Q**RSLIWNVP**T**EE 37

Nlug_UV-der 1 MEVFRGASDC---------PNE--S-VWGPQ--V---------------------S----F----R---TA**E**RTLIWNVP**L**EE 37

Lstr_UV-der 1 MDVFGGAKNC---------PNE--T-VWGPQ--V---------------------S----F----R---TA**E**RTLIWNVP**L**EE 37

Sfur_UV-der 1 MDVFSGAKNC---------PNE--T-VWGPQ--A---------------------S----F----R---TA**E**RTLIWNVP**L**EE 37

111222222223333333----33333444444444455555555556666666666777777777788888888889999999

789012345678901234----56789012345678901234567890123456789012345678901234567890123456

Btau_rhodopsin 17 TGVVRSPFEAPQYYLAEP----WQFSMLAAYMFLLIMLGFPINFLTLYVTVQHKKLRTPLNYILLNLAVADLFMVFGGFTTTLY 96

Craj_UV2-anc 32 --L----EHIPEHWLKYPAPEASLHLLLGLLYIGLFLMSILGNGLVLWIFSSAKCLRTPSNMFIVNLAFCDFVMML-KTPIFIY 108

Adif_UV2-anc 50 --I----PYVPEHWLKFPPPEMSLNLLLGLLYIVFFFMSIIGNGLVIWIFSTAKSLRTPSNMFVVNLAFLDFVMML-KTPIFIF 126

Craj_UV1-der 37 --L----VHIPEHWLKYPEPEASIHFLLGLLYILYFLMSTIGNGLVLWIFSSSKSLRTPSNLFVVNLAFCDLIMLL-KAPLFVY 113

Adif_UV1-der 35 --L----VHIPEHWLKYPEPEASLHFLLILLYLICFLLSTVGNGMVIWIFSTAKSLRTPSNMFVVNLAVLDFIMLS KSPLFIY 111

Focc_UV 45 --L----PHIPTHWLVYPEPDPLINYGLGVLYCFFFFFAVMGNGIVIYIFLTSKNLKTPSNIFVVNLAICDFVMMA-KTPIFIY 121

Dcit_UV 64 --R----FRIPEHWFQYEEIDPMYNYVLGCLYIVFTIFSICGNGMVIWVFIAAKSLRTPSNIFVLNLALMDFMMMV-KTPIFIY 140

Pcel_UV 64 ----------------------MNNYILGSLYCVFCAVSLIGNGLVIWIFLTAKALRTPSNLFVVNLAIMDFVMML-KTPIFIY 161

Apis_UV-anc 42 --L----IHIPEHWLKYQEP**S**SLQHYYLAFMYTI**F**MFVALFGNGLVIWVFCVAKPLRTPSNIFVINLALCDF**V**M**M**A-**K**API**F**IL 118

Rmai_UV-anc 42 --L----IHIPEHWLKYQEP**S**ALQHYYLAFMYTL**F**TFIALFGNGLVIWIFCIAKPLRTPSNIFVINLALCDF**V**M**M**A-**K**API**F**IY 118

Mper_UV-anc 42 --L----IHIPEHWLKYQEP**S**SLQHYYLAFMYTI**F**TFVALFGNGLVIWIFCIAKPLRTPSNIFVINLALCDF**V**M**M**A-**K**SPI**F**IY 118

Sfla_UV-anc 42 --L----IHIPEHWLKYEEP**S**ALQHYYLAFMYTI**F**TIIALVGNGLVIWIFCISKSLRTPSNIFVINLALCDF**L**M**M**A-**K**API**F**IY 118

Cced_UV-anc 41 --L----VHIPDHWLNYQEP**S**SLSHYYLAFMYSI**F**TIFALVGNGLVIWIFCVAKPLRTPSNIFVINLALCDF**C**M**M**A-**K**API**F**IY 117

Apis_UV-der 37 --L----THIPEHWLSYPEV**R**SLYHYILAFSYTI**L**FCLGVIGNGLVLWIFCVSKPLRTPSNLFVLNLALCDF**S**M**V**L-**V**LPI**L**IY 113

Rmai_UV-der 37 --L----THIPEHWLSYPEV**R**SLYHYILAFAYTI**L**FSLGVIGNGLVLWIFCVSKPLRTPSNLFVLNLALCDF**S**M**V**L-**V**LPI**L**IY 113

Mper_UV-der 37 --L----THIPEHWLSYPEV**R**SLYHYILAFAYTI**L**FCLGVIGNGLVLWIFCVSKPLRTPSNLFVLNLAMCDF**S**M**V**L-**V**LPI**L**IY 113

Sfla_UV-der 35 --L----IHIPEHWLSYPEV**R**SIYHYILAFMYSI**L**FSLGVIGNGLVLWIFCVSKPLRTPSNLFVLNLALCDF**S**M**V**L-**V**LPI**L**IY 111

Cced_UV-der 35 --L----VHVPEHWLSYPEV**R**SMYHYIMAFSYSI**L**FVIGIIGNGLVIWIFSLSKPLRTPSNLFVLNLALCDF**S**M**V**L-**V**LPI**L**IY 111

Ncin_UV 39 --L----VHIPQHWLKYQAPEAMQHYMLGFIYIFFMIASLIGNGLVIWIFCGARNLRTPSNMFVINLAICDFMMML-KTPIFIY 115

Evit_UV 42 --L----VHIPQHWLKYPAPEPIQHYVLGFLYIFFMFAALFGNGLVIWIFCGAKNLRTPSNMFVINLALCDFLMMS-KTPIFIY 118

Monu_UV 42 --L----VHIPQHWLKYPAPEPIQHYVLGFLYIFFMFAALFGNGLVIWIFCGAKNLRTPSNMFVINLALCDFLMMS-KTPIFIY 118

Nlug_UV-anc 38 --L----AN**I**PEHWFN**Y**P**E**P**D**PMYNYVLGL**L**YVF**F**MFFS**L**IGNGLVIWIF**C**SAKSLRTPSNMFVVNLALCD**F**MMMV-KTPIFIY 114

Lstr_UV-anc 38 --L----PH**I**PEHWFN**Y**P**E**P**D**PMYNYVLGL**L**YVF**F**MFFS**L**VGNGLVIWIF**C**SAKSLRTPSNMFVVNLALCD**F**LMML-KTPIFIY 114

Sfur_UV-anc 38 --L----PH**I**PEHWFN**Y**P**E**P**D**PMYNYVLGL**L**YVF**F**MFFS**L**VGNGLVIWIF**C**SAKSLRTPSNMFVVNLALCD**F**MMML-KTPIFIY 114

Nlug_UV-der 38 --L----EH**V**PEHWFN**H**P**A**P**E**PIYNYVLGL**V**YMF**Y**MFFS**F**IGNGLVIWIF**S**SAKTLRTPSNMFVVNLAICD**L**LMMV-KIPIFIY 114

Lstr_UV-der 38 --L----EH**V**PEHWFN**H**P**A**P**E**PIYNYVLGI**V**YMF**Y**MFFS**F**VGNGLVIWIF**S**SAKSLRTPSNMFVVNLAICD**L**LMMI-KIPIFIY 114

Sfur_UV-der 38 --L----EH**V**PEHWFN**H**P**A**P**E**PIYNYILGL**V**YMF**Y**MFFS**F**VGNGLVIWIF**S**SAKSLRTPSNMFVVNLAICD**L**LMMV-KIPIFIY 114

111111111111111111111111111111111111111111111111111111111111111111111111-1111111

9999000000000111111111122222222223333333333444444444455555555555666666666777-7777777

7890123456789012345678901234567890123456789012345678901234567890123456789012-3456789

Btau_rhodopsin 97 TSLHGYFVFGPTGCNLEGFFATLGGEIALWSLVVLAIERYVVVCKPMSNFRFGENHAIMGVAFTWVMALACAAPPL-VGWSRYI 179

Craj_UV2-anc 109 NSFNRGFAAGFVSCQVFGVMGTLSGIGAGMSNACIAYDRYHTITNPLEG-KLTRTKALVMILFVWTYTTPWAILPLFEIWGKFV 191

Adif_UV2-anc 127 NSFKQGFYLSMVWCYVFVIAGTYSGIGASMTNVCIAYDRYHTITNPMEG-RLTRTKALLMILFIYVYVTPFAILPYLKIWGNFI 209

Craj_UV1-der 114 NAFNRGYATGHIGCQIFAMVGSLSGIGAGTTNACIAYDRYTTITNPLEG-RLSKTKAVILIIFVWMYTMPWVVLPLLEIWSRFV 196

Adif_UV1-der 112 NAFHRGYA**A**G**H**LGCQI**F**GTI**GT**LS**GI**GA**G**MTDVCIAYDRY**T**TITNPLEG-RMSKIKAIIMIIFVWLYTLPWIILP**F**TEVWNRFV 194

Focc_UV 122 NSFNLGPASGPTACLVFATMGSFSGIGAGATNAVIAYDRYMTIAKPFGS-KMTRGKAIMIIFFLWMWVTPWVVFPATEIWGRFV 204

Dcit_UV 141 NSFNQGYALGHQGCQIFGLMGSISGIGQSATNVAIAYDRYRVIAKPMDG-RMSYSKALMILILIYCYVIPWAMFPYLEKWSRFV 223

Pcel_UV 162 NSFHQGYELGHQGCQWFGLMGAITGIGQSATNVAIAYDRYRVIAKPMDG-RMSFSKAFIILIMIYAYVLPWALFPYFEKWSRFV 144

Apis_UV-anc 119 GSINR**G**Y-**Q**GHFLCQLFGTAG**A**FSGIGA**S**ATNAAIAYDRFSTIAKPF**D**G-RMTYG**R**AFFLIICIWTYTLPWGLLPLTEKWNRYV 200

Rmai_UV-anc 119 SSINR**G**Y-**Q**GHFLCQLFGVAG**A**FSGLGA**S**ATNAAIAYDRFSTIAKPF**D**G-RMTYG**R**ALFLIVCIWTYTLPWGILPLTEKWNRFV 200

Mper_UV-anc 119 SSINR**G**Y-**Q**GHFLCQLFGVAG**A**FSGLGA**S**ATNAAIAYDRFSTIAKPF**D**G-RMTYG**R**AFFLIICIWTYTLPWGLLPLTEKWNRYV 200

Sfla_UV-anc 119 GSVQR**T**Y-**Q**GHFLCQAFALAG**T**ISGLGA**S**ITNAAIAYDRYSTIAKPF**E**G-RMTYG**R**AFFIMILIWAYVFPWCFLPATEKWNRYV 200

Cced_UV-anc 118 NSIQR**G**Y-**Q**GHLNCQIFAMAG**S**ISGIGA**S**ATNAAIAYDRFSTIAKPF**D**G-RMTFG**K**AFILIICIWTYVLPWCFLPLTEKWNRFV 199

Apis_UV-der 114 DSIDH**K**Y-**P**GHLQCQIFALCG**S**ISGIGA**G**ATNAAIAYDRYSTIAKPF**E**G-RMTYG**K**ALILIICIWIYVLPWCLLPLTEKWNRFV 195

Rmai_UV-der 114 DSINH**K**Y-**P**GHLQCQIFALCG**S**ISGIGA**G**ATNAAIAYDRYSTIAKPF**E**G-RMTYG**K**ALILIICIWIYVLPWCILPLTEKWNRFV 195

Mper_UV-der 114 DSIDH**K**Y-**P**GHLQCQIFALCG**S**ISGIGA**G**ATNAAIAYDRYSTIAKPF**E**G-RMTYG**K**ALILIICIWIYVLPWCLLPLTEKWNRYV 195

Sfla_UV-der 112 DSINH**K**Y-**P**GHLQCQIFALCG**S**ISGIGA**G**ATNAAIAYDRYSTIAKPF**E**G-RMTYG**K**ALILIICIWMYVFPWCFLPLTEKWNRYV 193

Cced_UV-der 112 DSIDH**K**Y-**P**GHLQCQIFALCG**S**ISGIGA**G**ATNAAIAYDRYSTIAKPF**E**G-RMTYG**K**ALILIVCIWIWVFPWCYLPLSEKWNRYV 193

Ncin_UV 116 NSFNLGFALGQTGCQVFSIMGSLSGIGAAATNAAIAYDRYSTIARPLDG-KMSRGKAFLFILCIWAYVSPWVFLPATQTWGRYA 198

Evit_UV 119 NSFKLGFALGQFWCQVFAIAGSLSGIGAAATNAVIAYDRYSTIARPLDG-KMSKGKAFLFLLCIWIYTTPWVFLPATQTWGRYA 201

Monu_UV 119 NSFKLGFALGQFWCQVFAIAGSLSGIGAAATNAVIAYDRYSTIARPLDG-KMSKGKAFLFLLCIWIYTTPWVFLPATQTWGRYA 201

Nlug_UV-anc 115 NSFNLGFA**T**GHLGCQIFATIGSFSGIGASATNAAIAYDRYNVIAKPLDG-RMSKGKAFLIILLIWAYVTPWSLMPLYGVWSRFV 197

Lstr_UV-anc 115 NSFNLGFA**S**GHLGCQIFGTIGSFSGIGASATNAAIAYDRYNVIAKPFDG-KMSKGKAFLIILLIWAYVTPWSLMPLYGYWSRFV 197

Sfur_UV-anc 115 NSFNLGFA**S**GHLGCQIFGTIGSFSGIGASATNAAIAYDRYNVIAKPFDG-KMSKGKAFLIILLIWAYVTPWSLMPLYGYWSRFV 197

Nlug_UV-der 115 NSFNLGFA**A**GHLGCQIFGTIGSFSGIGASATNAAIAYDRYNVIAKPFDG-KMSRGKAFLIILLIWAYVTPWSIMPLLEVWSRFV 197

Lstr_UV-der 115 NSFNLGFA**A**GHVGCQIFGTIGSFSGIGASATNAAIAYDRYNVIAKPFDG-KMSRGKAFLIILLIWAYVTPWSIIPLLEVWSRFV 197

Sfur_UV-der 115 NSFNLGFA**A**GHLGCQIFGTIGSFSGIGASATNAAIAYDRYNVIAKPFDG-KMSRGKAFLIILLIWAYVTPWSIMPLFEVWSRFV 197

11111111111111111111222222222222222222222222222222222 222222222 2 2222222

78888888889999999999000000000011111111112222222222333 333333344 4 4444444

01234567890123456789012345678901234567890123456789012 345678901 2 3456789

Btau_rhodopsin 180 PEGMQCSCGIDYYTPHEETNNESFVIYMFVVHFIIPLIVIFFCYGQLVFTVKE--AAAQQQESA----------T--TQKAEKE 249

Craj_UV2-anc 192 PEGFLTQCTFDYLTNTFDT--HLFVGVLFTFSYVIPMSLIIYYYSQIVSHVIDHEKALREQAKKMNVDSLRSNQQQQNQSAEVR 273

Adif_UV2-anc 210 PEGYLTQCGIDYLTLTFDN--KSFVTTLFTCSYVIPMSLIIYYYIQIVGHVMDHEKALKEQAKKMNVDSLRSNQQQQNQSMEIR 291

**Craj_UV1-der** 197 PEGFLTACSFDYLTDSFDN--HLFVASIFTTSYVIPMLLIIYYYSQIVMHVIRHERTLKEQAKKMNVDSLRSNQTQMNQSTEIR 278

Adif_UV1-der 195 PEGFLT**T**C**S**FDYITDTFDT--RLFVVT**I**FVWS**Y**VFPLLLIIYFYTQIVAHVFRHEKALKQQAKKMNVDSLRSNQ**A**QADQSMEIR 276

Focc_UV 205 PEG**F**LTSCTFDYMSDTDHI--RVFVGVMFFVCYCIPMTMIIYFYSQIVSHVVAHEKALKAQAKKMNVESLRSNVDKNQDSTEIR 286

Dcit_UV 224 PEGYLTSCTFDYLTPTESI--RFYVLFMFIICYCIPMGMIINFYSQIVGHVFSHEKALREQAKKMNVESLRSGQKEGQSSAEVR 305

Pcel_UV 145 PEGYLTSCSFDYLTPTESV--RFYVLFMFIICYCFPMTLIINFYSQIVGHVFSHEKALREQAKKMNVESLRSGQKEGQSSAEVR 226

Apis_UV-anc 201 PEG**Y**LTSC**T**FDYLSPTDET--RAFVGIMFVICYVIPVSL**V**IFFYSQIVSHVFNHEKALREQAKKMNVESLRSNQDANAQSAEVR 282

Rmai_UV-anc 201 PEG**Y**LTSC**T**FDYLSPTDET--KAFVGIMFVICYVIPVSL**V**IFFYSQIVSHVFNHEKALREQAKKMNVESLRSNQDANAQSAEVR 282

Mper_UV-anc 201 PEG**Y**LTSC**T**IDYLTPTDET--RAFIGIMFVICYVIPVSL**V**IFFYSQIVSHVFNHEKALREQAKKMNVESLRSNQDANAQSAEVR 282

Sfla_UV-anc 201 PEG**Y**LTSC**T**IDYLTPTDET--RAFIGIMFTICYIIPVSL**V**IYFYSQIVSHVFNHEKALREQAKKMNVESLRSNQDANAQSAEVR 282

Cced_UV-anc 200 PEG**Y**LTSC**T**FDYLSPTDET--KAFVGIMFVICYVIPMSL**V**VYFYSQIVTHVFNHEKALREQAKKMNVESLRSNQDANAQSAEVR 281

Apis_UV-der 196 PEG**F**LTSC**S**FDYLTPTEET--KAFVGTMFVICYVIPMSF**I**IYFYSQIVCHVFNHEKALREQAKKMNVESLRSNQDANAQSAEVR 277

Rmai_UV-der 196 PEG**F**LTSC**S**FDYLTPTEET--KAFVATMFVICYVIPMSF**I**IYFYSQIVCHVFNHEKALREQAKKMNVESLRSNQDANAQSAEVR 277

Mper_UV-der 196 PEG**F**LTSC**S**FDYLTPTEET--KAFVGTMFVICYVIPMSF**I**IYFYSQIVCHVFNHEKALREQAKKMNVESLRSNQDANAQSAEVR 277

Sfla_UV-der 194 PEG**F**LTSC**S**FDYLTPTDET--KAFVGILFVICYVIPMSF**I**IYFYSQIVSHVFNHEKALREQAKKMNVESLRSNQDANAQSAEVR 275

Cced_UV-der 194 PEG**F**LTSC**S**FDYLTQTDET--KFFVGVLFVICYVIPLSF**I**IYFYSQIVNHVFNHERALREQAKKMNVESLRSNQDANAQSAEVR 275

Ncin_UV 199 PEGYLTACSFDYLTNTDEN--RFFVLVLFCVCYVLPMSLIVFFYSQIVSHVVHHEKALRDQAKKMNVESLRSNQQQQSQSAEIR 280

Evit_UV 202 PEGYLTACSFDYLTNTDEN--RFFVLVLFFVCYVLPMSMIIFFYSQIVSHVVDHEKALREQAKKMNVESLRSNQSQQAQSAEIR 283

Monu_UV 202 PEGYLTACSFDYLTNTDEN--RFFVLVLFFVCYVLPMSMIIFFYSQIVSHVVDHEKALREQAKKMNVESLRSNQNQQAQSAEIR 283

Nlug_UV-anc 198 PEG**Y**LTSCSFDYLTK**S**ESI--**Q**YW**V**GTMFVICYCIPMSLIIYYYSQIVSHVVNHEKALREQAKKMNVDSLRSNQAQQN**Q**SAEVR 279

Lstr_UV-anc 198 PEG**Y**LTSCSFDYLTK**N**ESI--**Q**YW**V**GTMFVICYCIPMSLIVYYYSQIVSHVVNHEKALREQAKKMNVDSLRSNQAQQN**Q**SAEVR 279

Sfur_UV-anc 198 PEG**Y**LTSCSFDYLTK**N**ESI--**Q**YW**V**GTMFVICYCIPMSMIIYYYSQIVSHVVNHEKALREQAKKMNVDSLRSNQAQQN**Q**SAEVR 279

Nlug_UV-der 198 PEG**F**LTSCSFDYLTK**T**DSI--**R**YW**T**ATMFVICYCIPMSMIIYYYSQIVSHVVNHEKALRKQAKKMNVDSLRSNQAAQS**M**SAEVR 279

Lstr_UV-der 198 PEG**F**LTSCSFDYLTN**T**DSI--**R**YF**T**ATMFVICYCIPMSMIIYYYSQIVNHVVNHEKALRKQAKKMNVDSLRSNQAQQS**M**SAEVR 279

Sfur_UV-der 198 PEG**F**LTSCSFDYLTK**T**DSI--**R**YF**T**AVMFLICYCIPMSMIIYYYSQIVNHVVNHEKALRKQAKKMNVDSLRSNQAQQS**M**SAEVR 279

22222222222222222222222222222222222222222222222222333333333333333333333333333333333

55555555556666666666777777777778888888889999999999000000000011111111112222222222333

01234567890123456789012345678901234567890123456789012345678901234567890123456789012

Btau_rhodopsin 250 VTRMVIIMVIAFLICWLPYAGVAFYIFTHQGSDFGPIFMTIPAFFAKTSAVYNPVIYIMMNKQFRNCMVTTLCCGKNPLGDDE- 332

Craj_UV2-anc 274 IAKVAITICFLFVASWTPYAVLAMIGAFGDQSLITPGFAMIPACACKLVACLDPYVYALSHPRYRVELQKRLPWLAINEKDP-- 355

Adif_UV2-anc 292 IAKVAITICFLFVAAWTPYGVMCLIGMYGDQNLITPGSAMVPALFCKTVACLDPYVYALSHPRFRLELQKRIPWLGINEKAP-- 373

Craj_UV1-der 279 IAKVALTITFLYVAAWTPYAVVAMIGAFGDQSLLTPGITMIPSCFCKCVACLDPYVYALSHPRYRVELQKRLPWLAIVEPTQ-- 360

Adif_UV1-der 277 IAKVAITITFL**F**VAAWTP**YA**VV**S**FIGAFGDRSLLTPGVTMIPA**CC**CKFIACVDPYVYALSHPRYRVELQRRLPWLSIKEHVP-- 358

Focc_UV 287 IAKMAISLSFLFVLSWTPYATVALIGAFGNKALLTPGVTMIPACCCKLVACFDPYVFALSHPRFRLELQKKMPFLDIKEDKPT- 369

Dcit_UV 306 IAKTAITLCALFVASWTPYAVVALTGAFGDQSLLTPGLTMIPACTCKAVACLDPYVYAISHPRYRLELSKRIPCLGIKEKEPE- 388

Pcel_UV 227 IAKTAITLCALFVFSWTPYAVVALTGAFGDRSLLTPGLTMIPACACKTVACLDPYVYAISHPRYRLELTKRFPCLGIKEKEPE- 309

Apis_UV-anc 283 IAKAAITICCLFIASWTPYAVVAMIGAFGDRSLLTP**G**ITMIPA**I**F**C**KTVACFDPYVYAISHPRYRLELSKRVPCLGISEKPPPT 366

Rmai_UV-anc 283 IAKAAITICCLFIASWTPYAIVAMIGAFGDRSLLTP**G**ITMIPA**I**F**C**KTVACFDPYVYAISHPRYRLELSKRVPCLGINEKPPPT 366

Mper_UV-anc 283 IAKAAITICCLFIASWTPYAVVAMIGAFGDRSLLTP**G**VTMIPA**I**F**C**KTVACFDPYVYAISHPRYRLELSKRVPCLGINEKPPT- 365

Sfla_UV-anc 283 IAKAAITICFLFIAAWTPYAVVAMIGAFGDQSLLTP**G**ITMIPA**I**F**C**KSVACFDPYVYAISHPRYRLELSKRIPCLGIEEKPPAT 366

Cced_UV-anc 282 IAKAAITICFLFIAAWTPYAVVAMIGAFGDKSLLTP**G**VTMIPA**I**F**C**KTVACFDPYVYAISHPRYRLELSKRIPCLGINEKPPAT 365

Apis_UV-der 278 IAKAAITICFLFVAAWTPYAVVAMIGAFGDQSLLTP**I**ASMLPA**V**F**A**KTVACFDPYVYAISHPKYRLELSKRVPCLGITEKPLA- 360

Rmai_UV-der 278 IAKAAITICFLFVAAWTPYAIVAMIGAFGDQSLLTP**I**ASMLPA**V**F**A**KTVACFDPYVYAISHPKYRLELSKRVPCLGINEKPPA- 360

Mper_UV-der 278 IAKAAITICFLFVAAWTPYAVVAMIGAFGDQSLLTP**I**ASMLPA**V**F**A**KTVACFDPYVYAISHPKYRLELSKRVPCLGITEKPPA- 360

Sfla_UV-der 276 IAKAAITICFLFVAAWTPYAVVAMVGAFGDQSLLTP**V**VTMLPA**V**F**A**KTVACLDPYVYAISHPKYRLELSKRVPCLGINEKSSV- 358

Cced_UV-der 276 IAKAAITICFLFIAAWTPYAAVALIGAFGDQSLLTP**I**VTMLPA**V**F**A**KTVACFDPYVYAISHPRYRLELSKRLPCLGINEKPPV- 358

Ncin_UV 281 IAKAAITICFLFVASWTPYAVLALIGAFGDQSLLTPGVTMIPALTCKAVACIDPYVYAISHPRYRVELAKRLPFLAINEQAP-- 362

Evit_UV 284 IAKAAITICALFVASWTPYAVLALIGAFGNQAMLTPGVTMIPALTCKAVARIDPYVYAISHPRYRVELAKRLPWLGVNEQEPK- 366

Monu_UV 284 IAKAAITICALFVASWTPYAVLALIGAFGNQAMLTPGVTMIPALTCKAVACIDPYVYAISHPRYRVELAKRLPWLGVNEQEPK- 366

Nlug_UV-anc 280 IAKVAITICFLFVA**S**WTPYA**V**VA**M**IGAFGNQALLTPG**L**TMIPA**CT**CKAVACIDPYVYAISHPRYRVELAKRLPWLAIKEAAPV- 362

Lstr_UV-anc 280 IAKVAITICFLFVA**S**WTPYA**V**VA**M**IGAFGNQALXTPG**L**TMIPA**CT**CKAVACIDPYVYAISHPRYRVELAKRLPWLAIKEAPPP- 362

Sfur_UV-anc 280 IAKVAITICFLFVA**S**WTPYA**V**VA**M**IGAFGNQALLTPG**L**TMIPA**CT**CKAVACIDPYVYAISHPRYRVELAKRLPWLAIKEAPPP- 362

Nlug_UV-der 280 IAKVAITICALFVA**A**WTPYA**I**VA**L**IGAFGNQSLLTPG**V**TMIPA**LA**CKSVACIDPYVYAISHPRYRMELAKRLPWLKIKETPTA- 362

Lstr_UV-der 280 IAKVAITICFLFVA**A**WTPYA**I**VA**L**IGAFGNQSLLTPV**V**TMIPA**LA**CKSVACIDPYVYAISHPRYRVELAKRLPWLRIKETSAA- 362

Sfur_UV-der 280 IAKVAITICFLFVA**A**WTPYA**I**VA**L**IGAFGNQSLLTPV**V**TMIPA**LA**CKSVACIDPYVYAISHPRYRVELAKRIPWLRIKETPTA- 362

33333333333 33 333

33333334444 44 444

34567890123 45 678

Btau_rhodopsin 333 -ASTTVSKTETS-QV-APA------- 348

Craj_UV2-anc 356 -SDTQSTATESS-TN-K---P----- 370

Adif_UV2-anc 374 -SDAQSVTTETA-SK-----G----- 387

Craj_UV1-der 361 -TDTASAVTEAS-NP-ATR-T----- 377

Adif_UV1-der 359 -SDSASVATESA-AP-NTGKI----- 376

Focc_UV 370 ASETASTTTEAT-SA-NPD------- 386

Dcit_UV 389 -KETASAQTEAT-T---P-------H 402

Pcel_UV 310 -KETASANTEAT-T---P-------H 323

Apis_UV-anc 367 AS**E**TQSTTTA---------------A 377

Rmai_UV-anc 367 AS**E**TQSTTTTT--------------A 378

Mper_UV-anc 366 PS**E**TQSTTTTT--------------A 377

Sfla_UV-anc 367 AS**E**TQSTTTTT--------------A 378

Cced_UV-anc 366 VS**E**TQSATTT---------------A 376

Apis_UV-der 361 TS**D**TQSITTA---------------A 371

Rmai_UV-der 361 TS**D**TQSITTA---------------A 371

Mper_UV-der 361 TS**D**TQSITTA---------------A 371

Sfla_UV-der 359 SP**D**TQSTTTT---------------A 369

Cced_UV-der 359 LA**E**TQSTTTS---------------A 369

Ncin_UV 363 SE-TVSTTTETTAA-TTPA------E 380

Evit_UV 367 HDNVSTTTTEAT-A-TTPA------E 384

Monu_UV 367 HDNVSTTTTEAT-A-TTPA------E 384

Nlug_UV-anc 363 -SETQS**A**VTETT-AS-TPAES----- 380

Lstr_UV-anc 363 -SETQS**A**VTETT-AT-TPAE------ 379

Sfur_UV-anc 363 -SETQS**A**VTETT-AT-TPAE------ 379

Nlug_UV-der 363 -SETQS**T**VTEST-VTATPAE------ 380

Lstr_UV-der 363 -SETQS**T**VTEST-VTAPPAE------ 380

Sfur_UV-der 363 -SETQS**T**VTEST-VSATPAVTATECN 386
